# Supplementary material for: Inference of gene regulation functions from dynamic transcriptome data
Source: eLife. 2016 Sep 21;5:e12188. doi: 10.7554/eLife.12188 (PMC5072840; doi:10.7554/eLife.12188)
Supplement: Figure 4—source data 1. — If evidence exists that the gene heading a row transcriptionally regulates the gene heading a column, the corresponding references are listed in the respective field. A '0' indicates that no direct evidence for a transcriptional regulation exists. DOI: http://dx.doi.org/10.7554/eLife.12188.010 [file elife-12188-fig4-data1.xlsx]

## Sheet: Sheet1
Interaction Table
0: no interaction
[x]: Reference
Gene	Hcm1	Swi5	Yhp1	Swi4	Fkh1	Ash1	Yox1	Fhl1	Ndd1	Fkh2
Hcm1	0	0	0	0	[1]	0	0	Motif Search	[2]	[1,3]
Swi5	0	0	0	0	0	[4,5,6]	0	0	0	0
Yhp1	0	0	0	[4,5,6,7,8,9,10]	0	0	0	0	0	0
Swi4	[4,5,7,11,12]	[4,5,7,11,12]	0	0	0	0	[4,5,7,11,12]	0	[4,5,6,7,11,12]	0
Fkh1	0	[13,14,15,16]	[4,7]	0	0	0	0	[4]	0	[13,17]
Ash1	0	0	[4]	0	0	0	0	0	0	0
Yox1	0	0	[18]	[4,5,6,7,8,9,10]	0	0	0	0	0	0
Fhl1	[18]	0	0	0	[2]	0	[18]	0	0	[4,5,18]
Ndd1	0	[4,5,7,8,14,15,19]	[4,5,7]	0	[7]	0	0	0	0	0
Fkh2	0	[4,5,6,7,14,15]	[4,5,7]	0	[4]	0	0	[5]	0	0
References
[1]	Pramila et al. (2006), Gen. Dev. 20: 2266–2278
[2]	Schawalder et al. (2004), Nature 432: 1058–1061
[3]	Reimand et al. (2010), Nucleic acids research 38: 4768–4777
[4]	Harbison et al. (2004), Nature 431: 99–104
[5]	Lee et al. (2002), Science 298: 799–804
[6]	Simon et al. (2001), Cell 106: 697–708
[7]	Workman et al. (2006), Science 312: 1054–1059
[8]	Tuch et al. (2008), PLoS Biology 6: e38
[9]	Mai et al. (2002), Mol. Cell. Biol. 22: 430–441
[10]	Pramila et al. (2002), Gen. Dev. 16: 3034–3045
[11]	Horak et al. (2002), Gen. Dev. 16(23): 3017-3033
[12]	Iyer et al. (2001), Nature 409: 533–538
[13]	Knott et al. (2012), Cell 148: 99–111
[14]	Koranda et al. (2000), Nature 406: 94–98
[15]	Kumar et al. (2000), Curr. Biol. 10: 896–906
[16]	Zhu et al. (2000), Nature 406: 90–94
[17]	Hollenhorst et al. (2001), Gen. Dev. 15: 2445–2456
[18]	Kasahara et al. (2007), Mol. Cell. Biol. 27: 6686–6705
