# Supplementary material for: Inference of gene regulation functions from dynamic transcriptome data
Source: eLife. 2016 Sep 21;5:e12188. doi: 10.7554/eLife.12188 (PMC5072840; doi:10.7554/eLife.12188)
Supplement: Figure 4—source data 2. — This table contains the inferred protein model parameter λ for each TF in the cell cycle oscillator model and both replicated. Additionally listed are the sets of target genes on which the inferences were performed. DOI: http://dx.doi.org/10.7554/eLife.12188.011 [file elife-12188-fig4-data2.xlsx]

## Sheet: Sheet1
TF	λ/τ - replicate 1	λ/τ - replicate 2	target set
Hcm1	0.101 / 6.86	0.06 / 11.55	Spc110, Spc43, Dsn1, Cin8
Swi5	0.026 / 26.66	0.0189 / 36.67	Pcl9, Egt2, Sic1, Cyk3, Pir1, Aim44, Dse3
Yhp1	0.03 / 23.1	0.0923 / 7.51	Msa1, Mcm2, Mcm3, Mcm4, Mcm5
Swi4	0.1040 / 6.66	0.1040 / 6.66	Dam1, Nud1, Stu2, YJL118w, Cbf2, Lte1, Srs2
Fkh1	0.04 / 17.33	0.045 / 15.4	Swi5, Alk1, Clb1, Clb2, Hst3, Kip2
Ash1	0.1386 / 5	0.1386 / 5	Ecm13, Yck1, Gic2, Rfc3, Tos6
Yox1	0.0166 / 41.76	0.0136 / 50.97	Msa1, Mcm2, Mcm3, Mcm4, Mcm5
Fhl1	0.06 / 11.55	0.06 / 11.55	YLR326w, Yat1, Pac11, Sld5, Met8, Ypt11
Ndd1	0.12 / 5.78	0.1040 / 6.66	Alk1, Clb1, Clb2, Hst3, Kip2
Fkh2	0.138 / 5.02	0.137 / 5.05	Alk1, Hof1, Hst3, Mob1
