# Supplementary material for: Inference of gene regulation functions from dynamic transcriptome data
Source: eLife. 2016 Sep 21;5:e12188. doi: 10.7554/eLife.12188 (PMC5072840; doi:10.7554/eLife.12188)
Supplement: Figure 4—source data 3. — Direction of regulation (activating or repressing) and, if available, references for each best fitted regulation function in the transcriptional cell cycle oscillator model. DOI: http://dx.doi.org/10.7554/eLife.12188.012 [file elife-12188-fig4-data3.xlsx]

## Sheet: Sheet1
TF	target	regulation type	reference
Hcm1	Fkh1	activating	[1]
Hcm1	Ndd1	activating	[1]
Hcm1	Fhl1	activating	N/A
Swi5	Ash1	activating	[2,3,4]
Yhp1	Swi4	repressing	[5]
Swi4	Swi4	activating	[6]
Swi4	Hcm1	activating	[7]
Swi4	Yox1	activating	[7]
Swi4	Yhp1	activating	[6,7]
Swi4	Ndd1	activating	[6]
Fkh1	Fhl1	activating	N/A
Fkh1	Swi5	activating	[8]
Ash1	Yhp1	repressing	[2]
Yox1	Swi4	repressing	[5]
Fhl1	Hcm1	repressing	N/A
Fhl1	Yox1	repressing	N/A
Ndd1	Fkh1	activating	N/A ([9])
Ndd1	Fhl1	activating	N/A ([9])
Ndd1	Swi5	activating	N/A ([9])
References
[1]	Pramila et al. (2006), Gen. Dev. 20: 2266–2278
[2]	Di Talia et al. (2009), PLoS Biology 7: e1000221
[3]	Bobola et al. (1996), Cell 84: 699–709
[4]	Doolin et al. (2001), Molecular Microbiology 40: 422–432
[5]	Pramila et al. (2002), Gen. Dev. 16: 3034–3045
[6]	Chua et al. (2006), Proc. Natl. Acad. Sci. USA 103: 12045–12050
[7]	Bean et al. (2005), Genetics 171: 49–61
[8]	Kumar et al. (2000), Curr. Biol. 10: 896–906
[9]	Darieva et al. (2003), Curr. Biol. 13: 1740–1745
