# Supplementary figures and images for: Inference of gene regulation functions from dynamic transcriptome data
Source: eLife journal article supplement (doi:10.7554/elife.12188), 2016-09-21

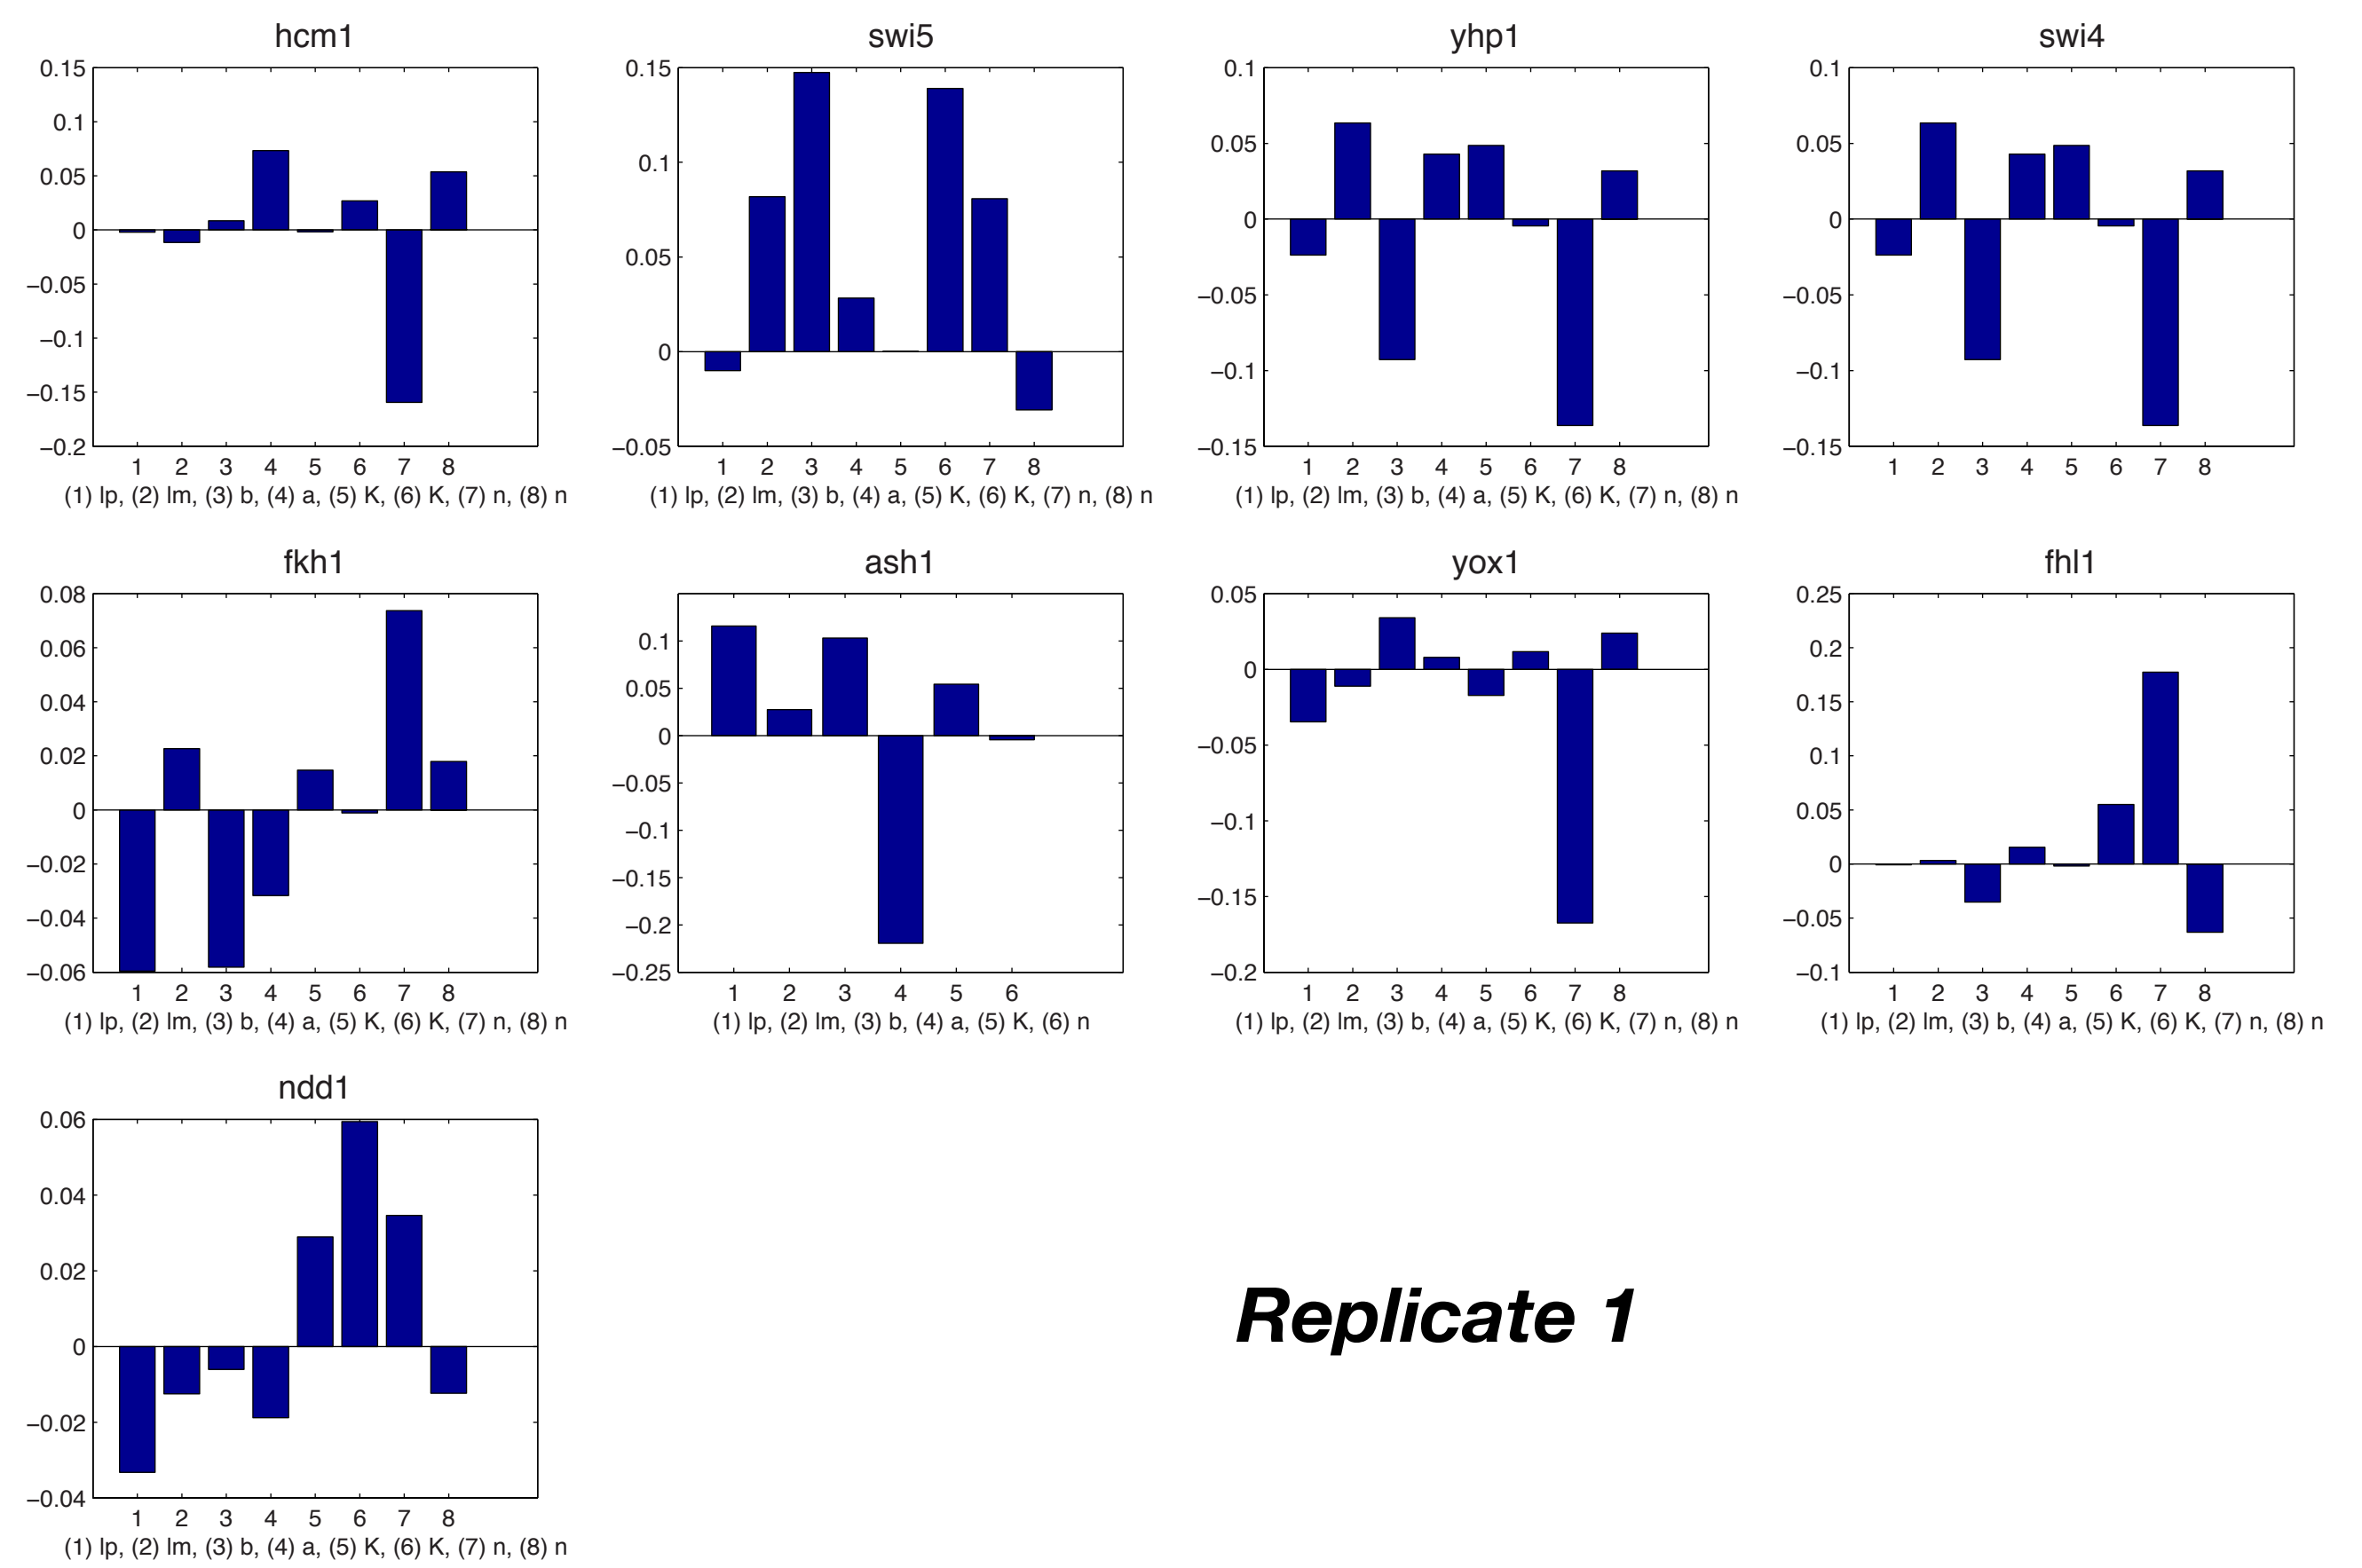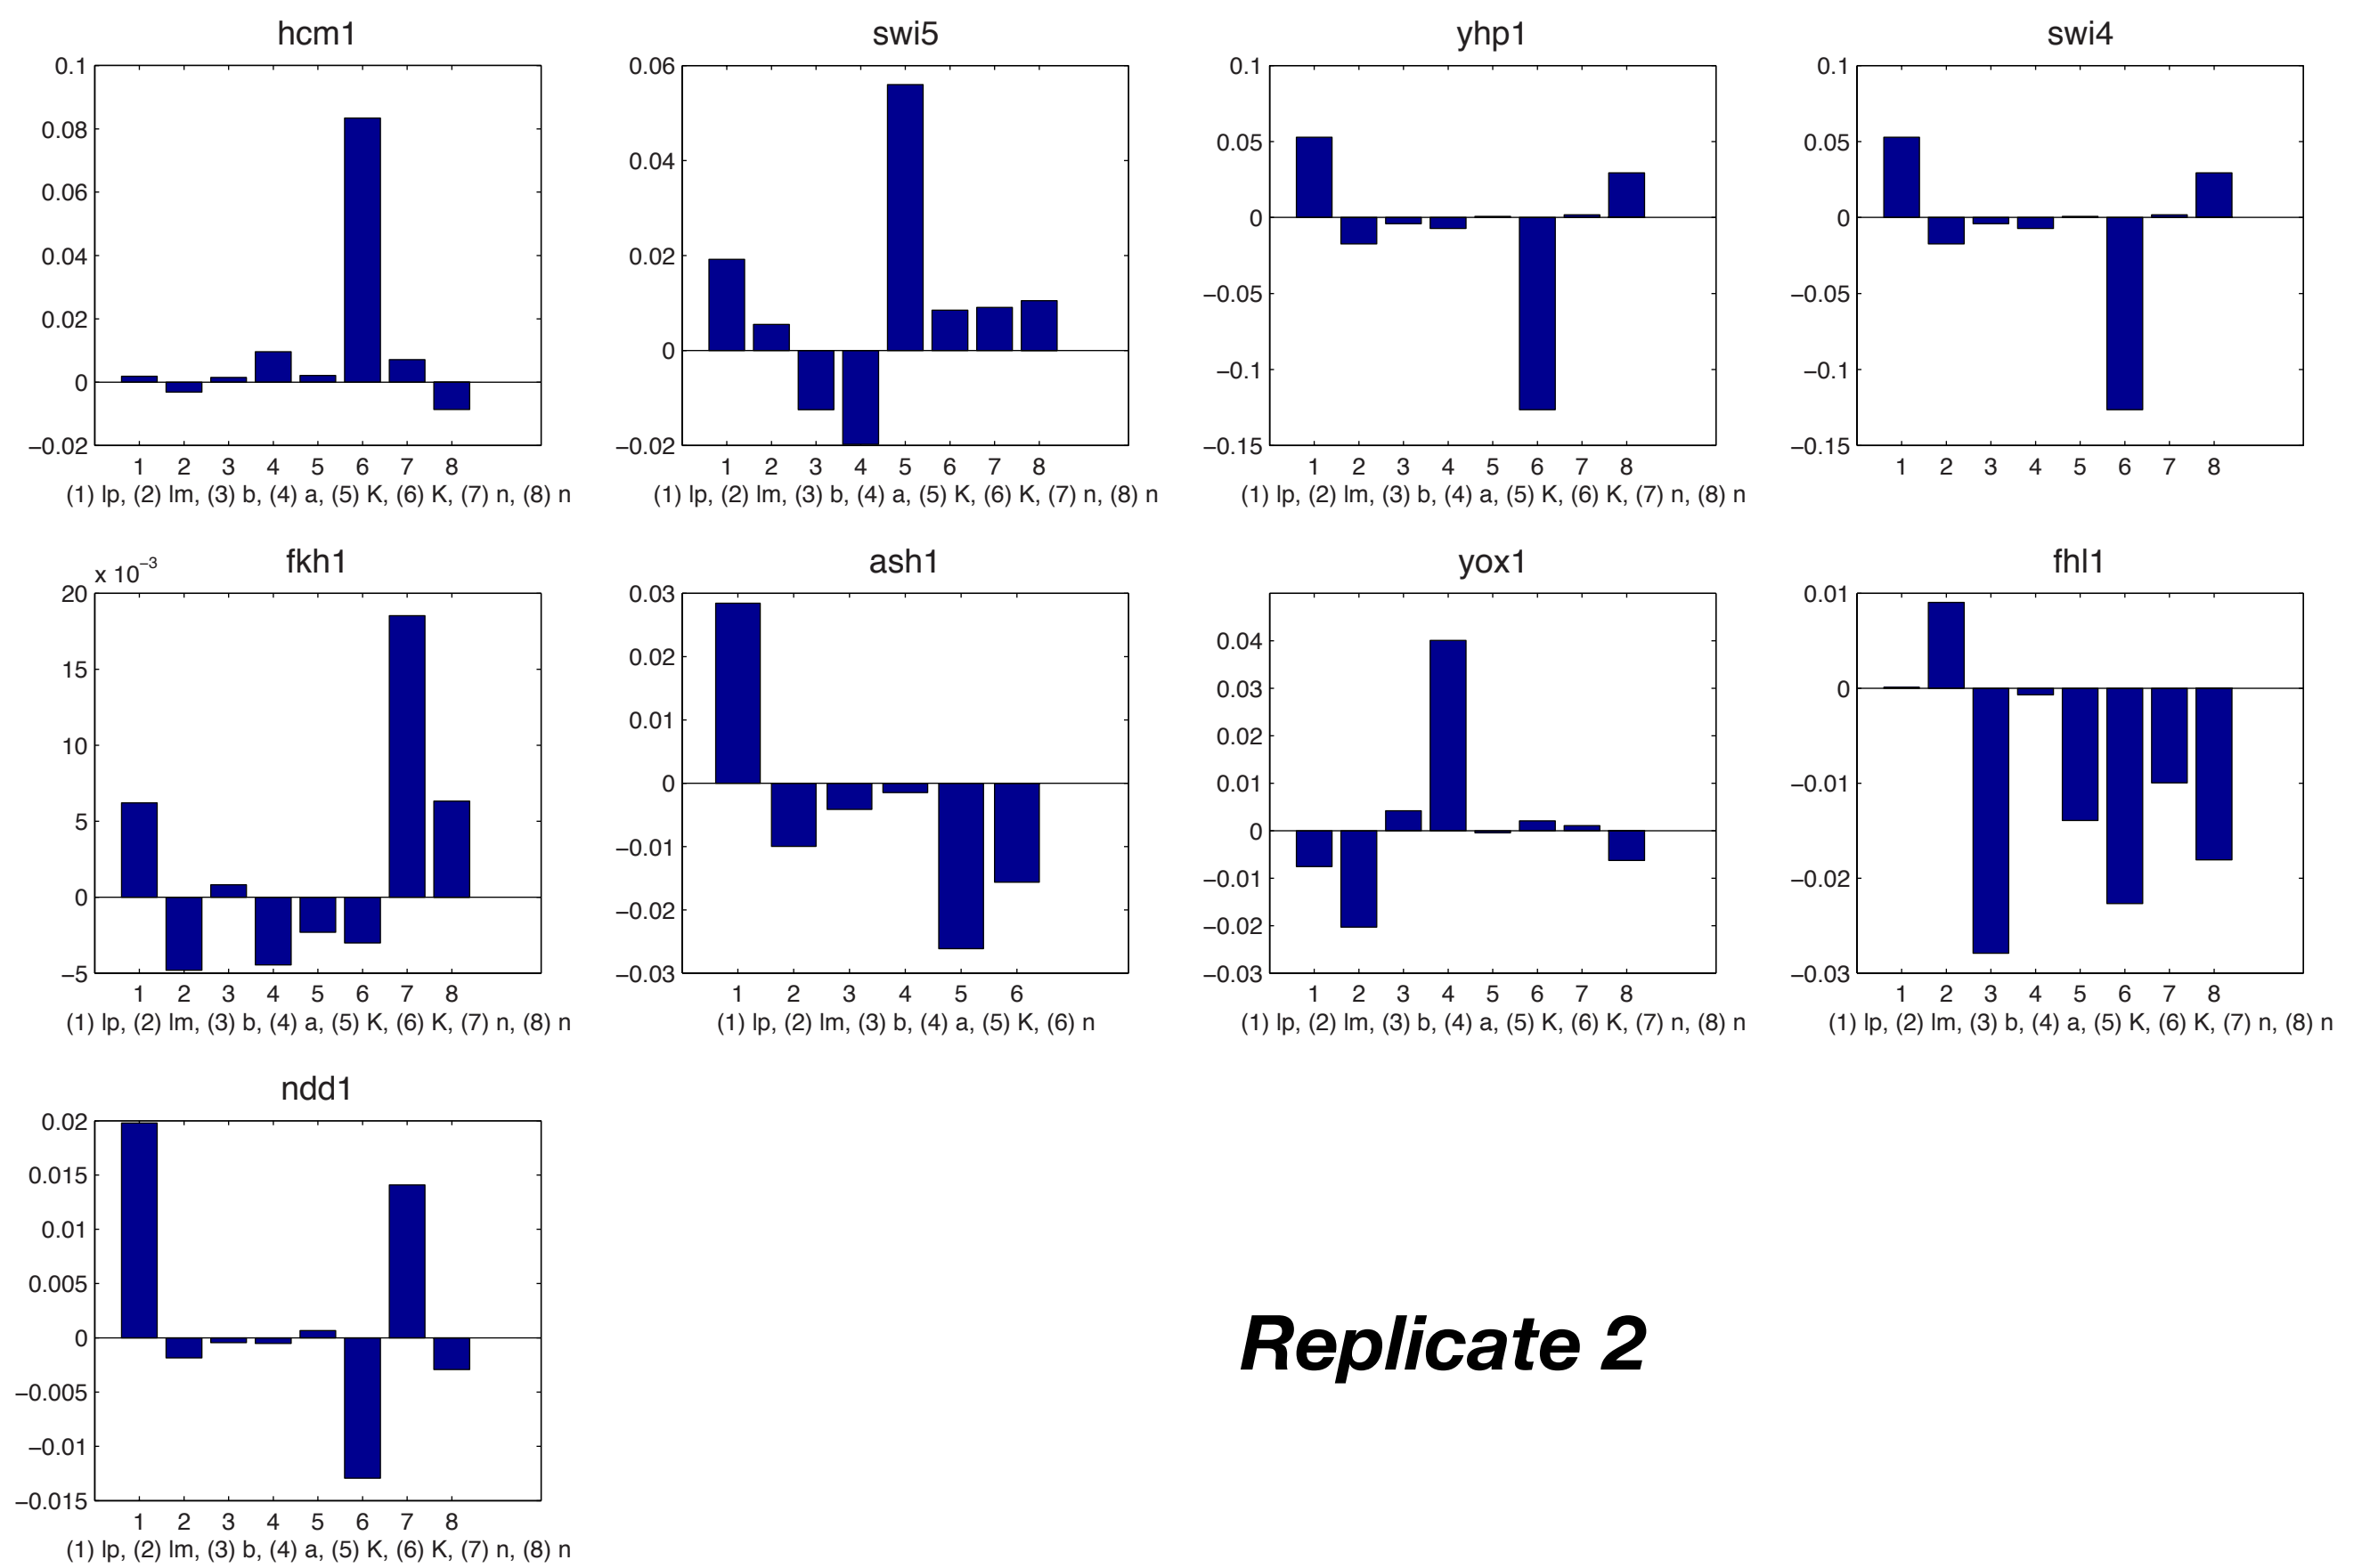

Supplement: supp [file elife-12188-supp-v1.zip]

replicate 1

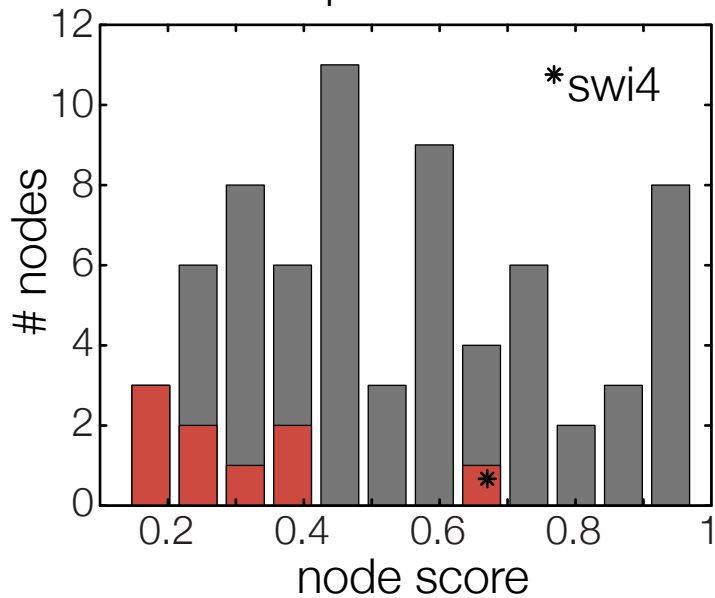

replicate 2

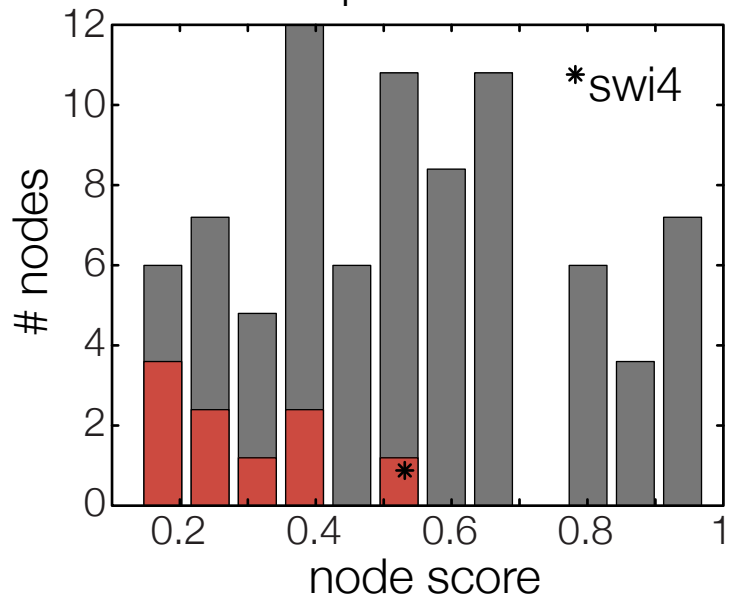

Supplement: supp [file elife-12188-supp-v1.zip]

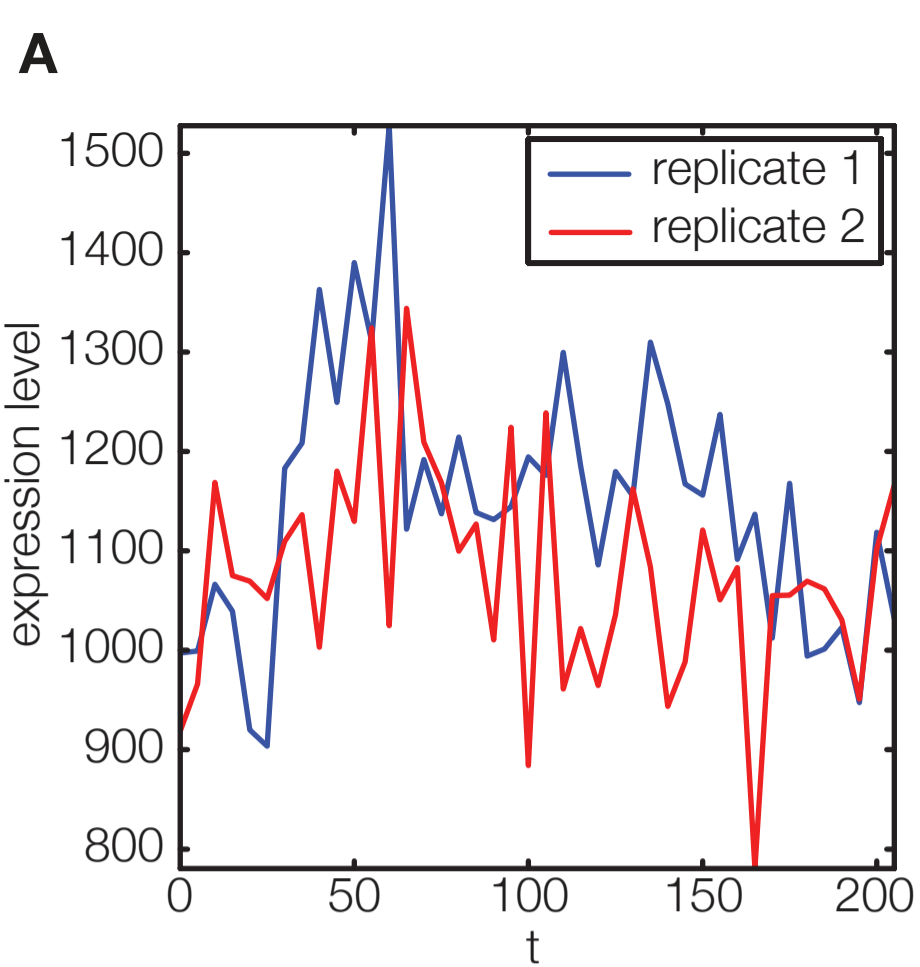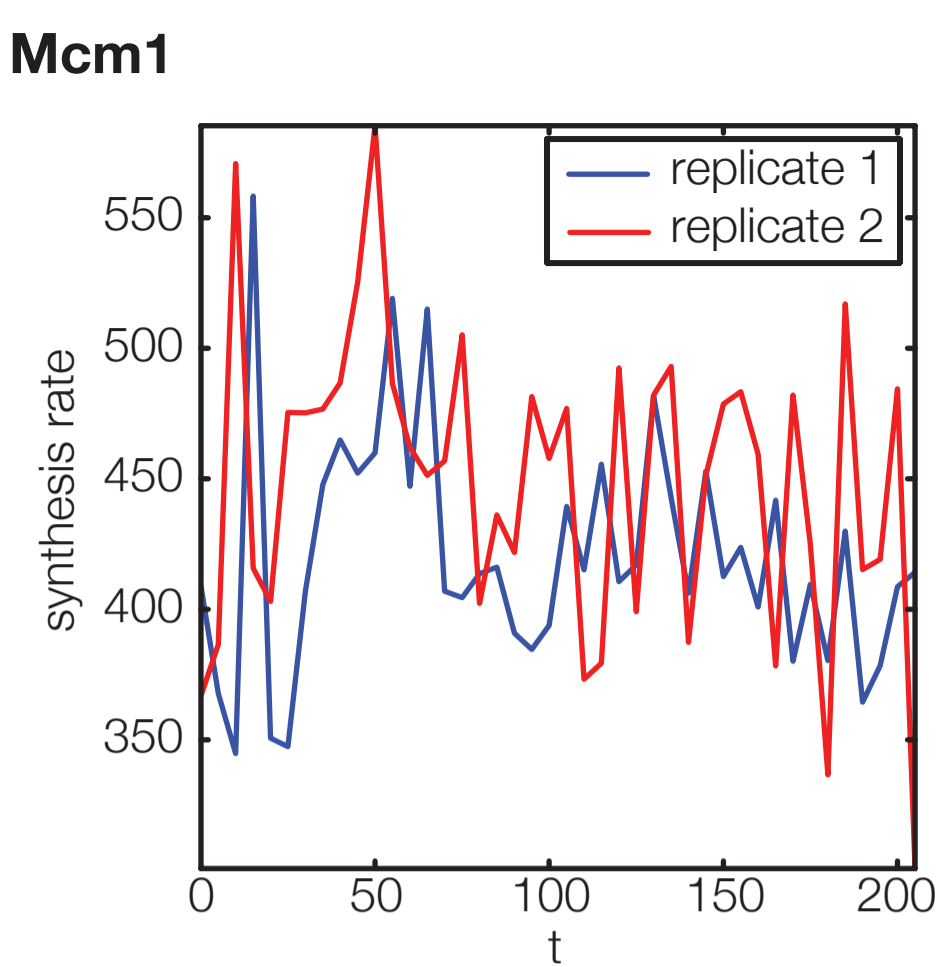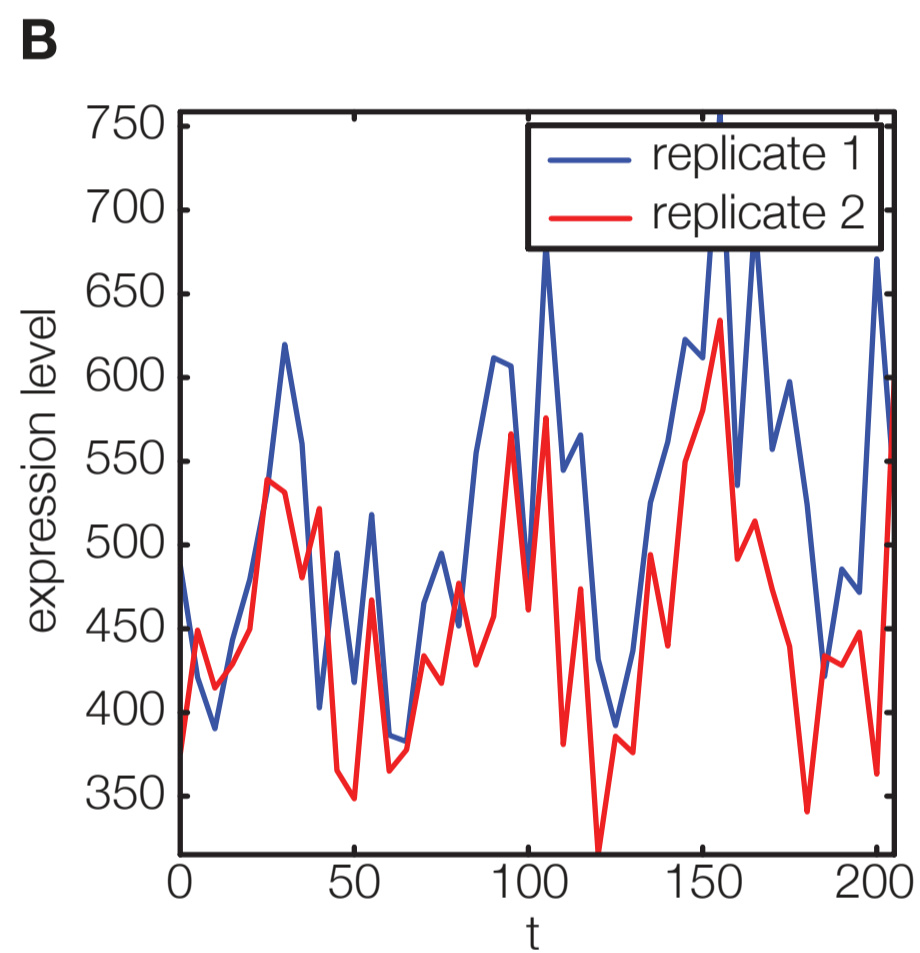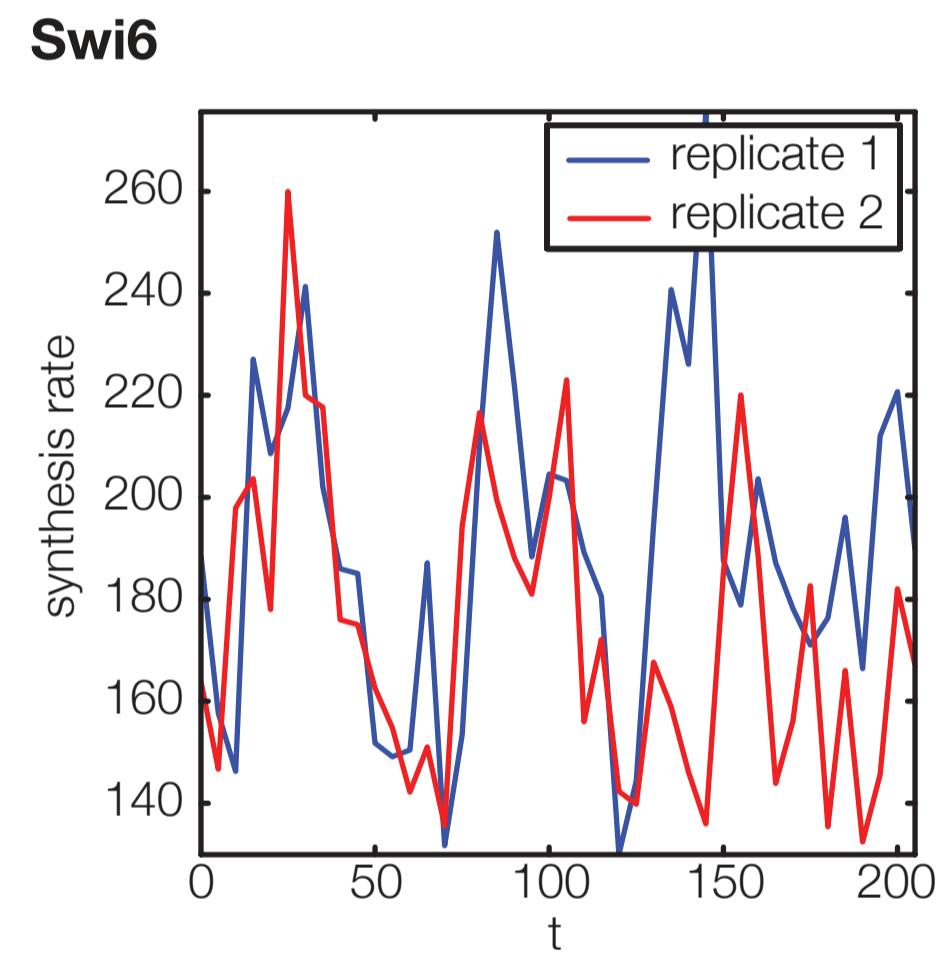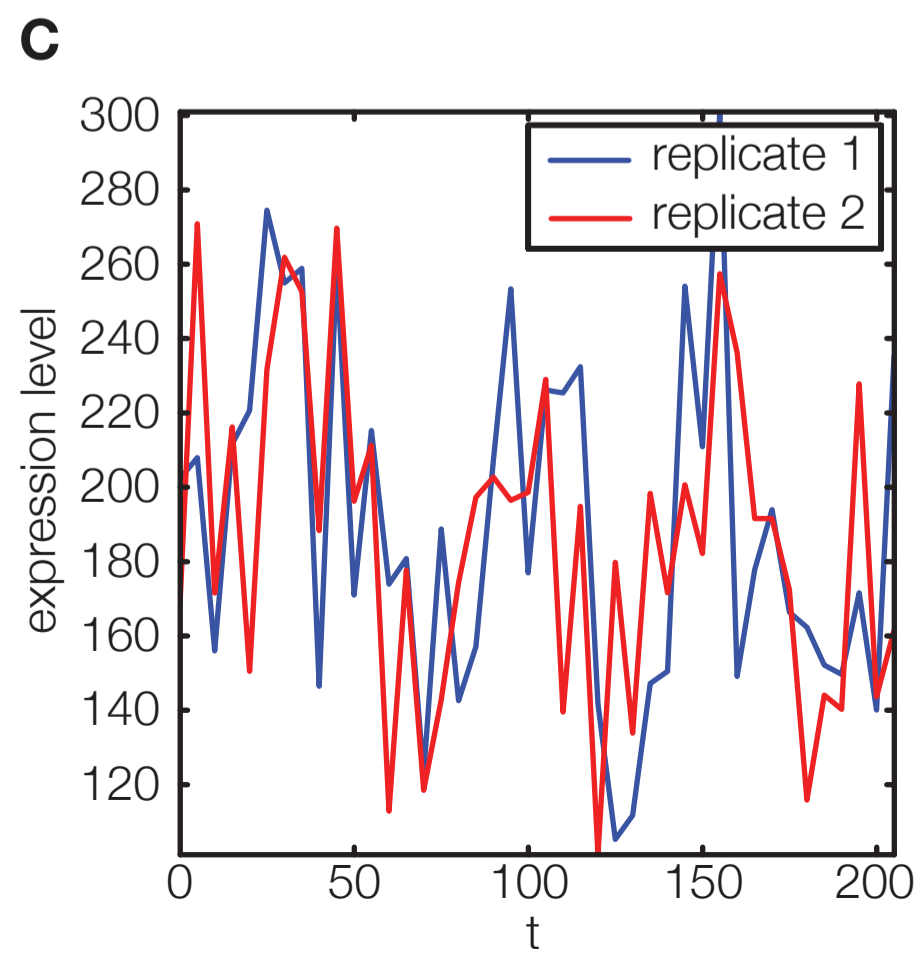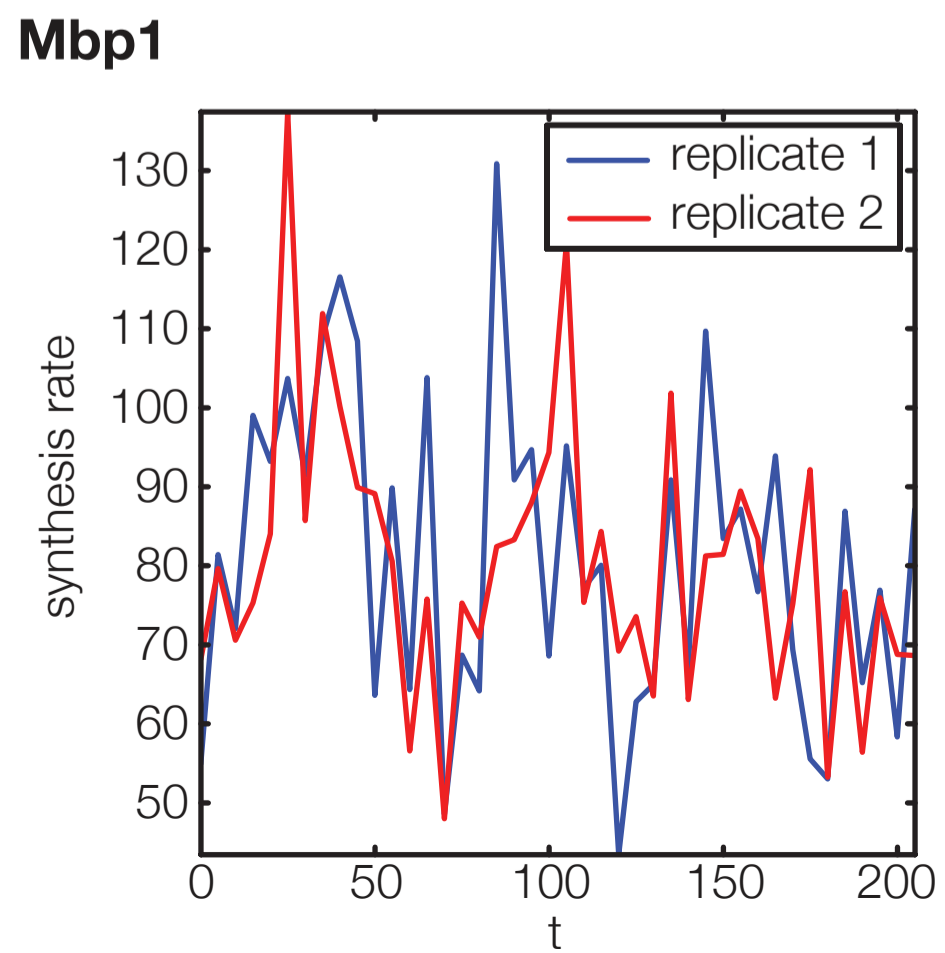

Supplement: supp [file elife-12188-supp-v1.zip]

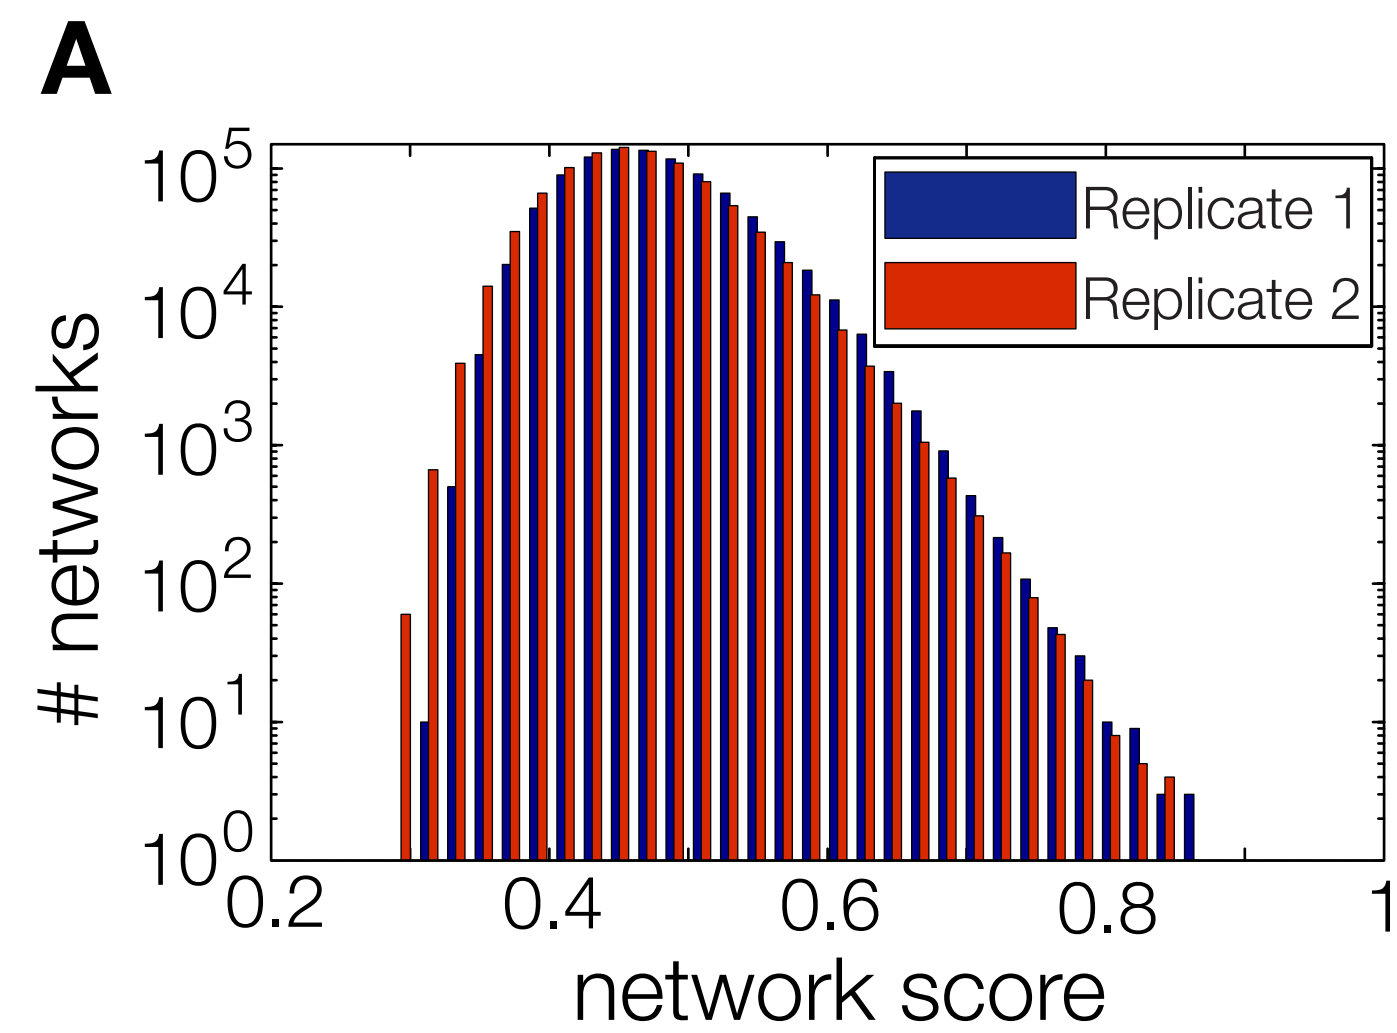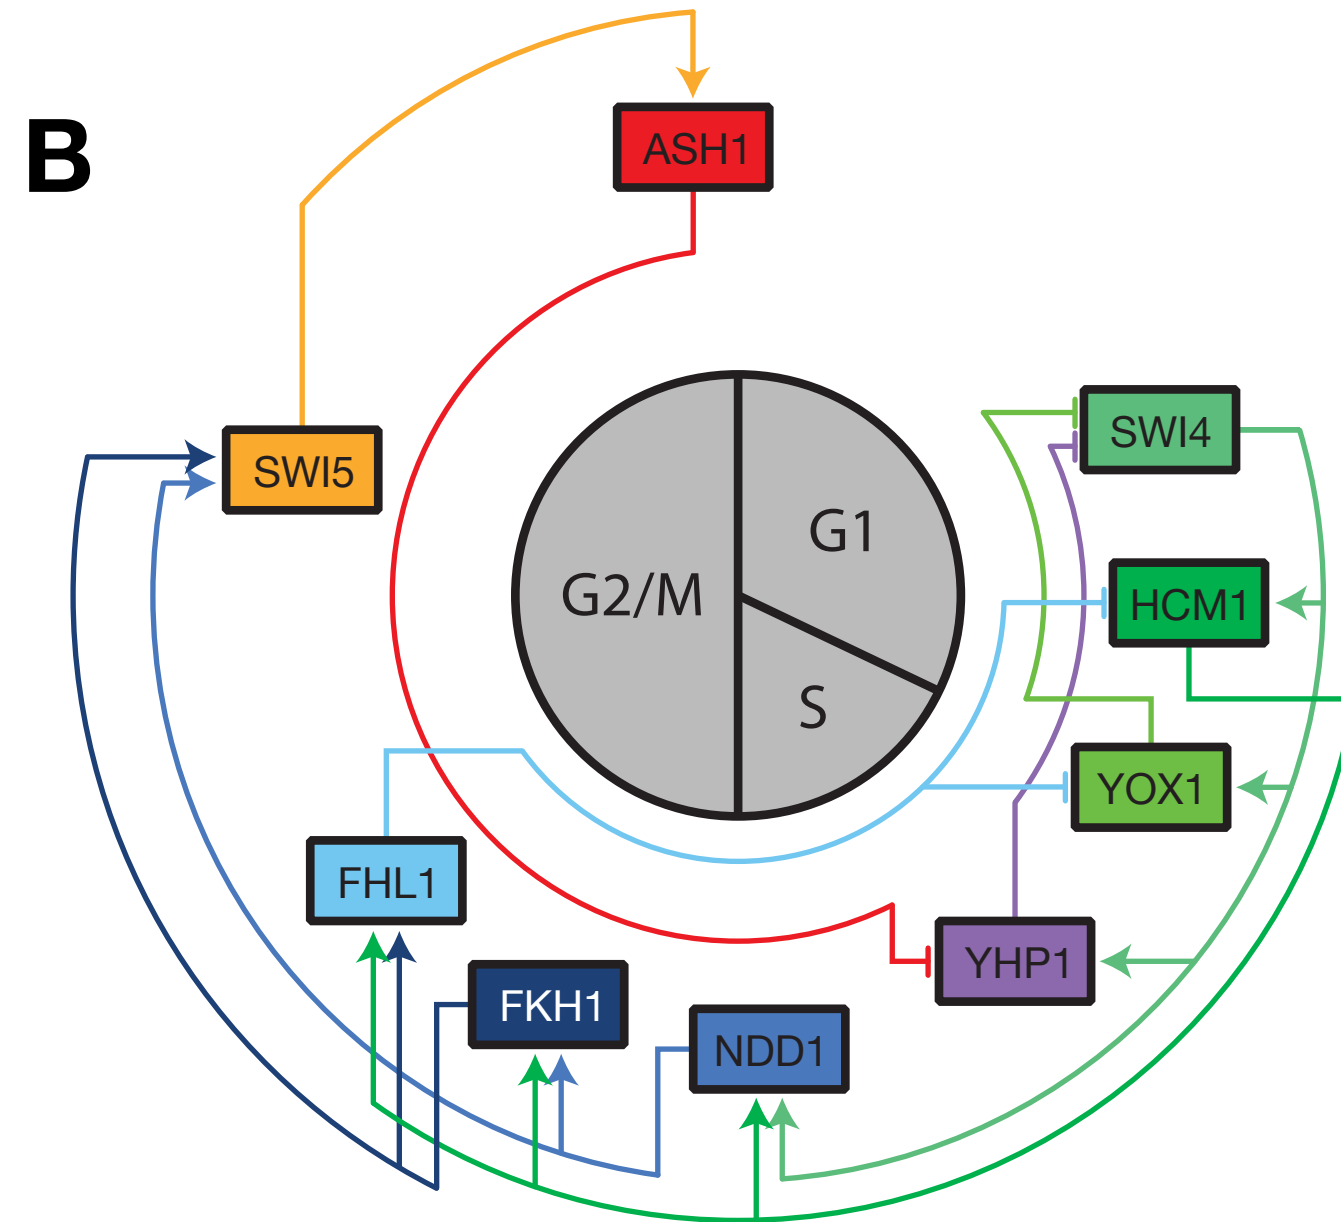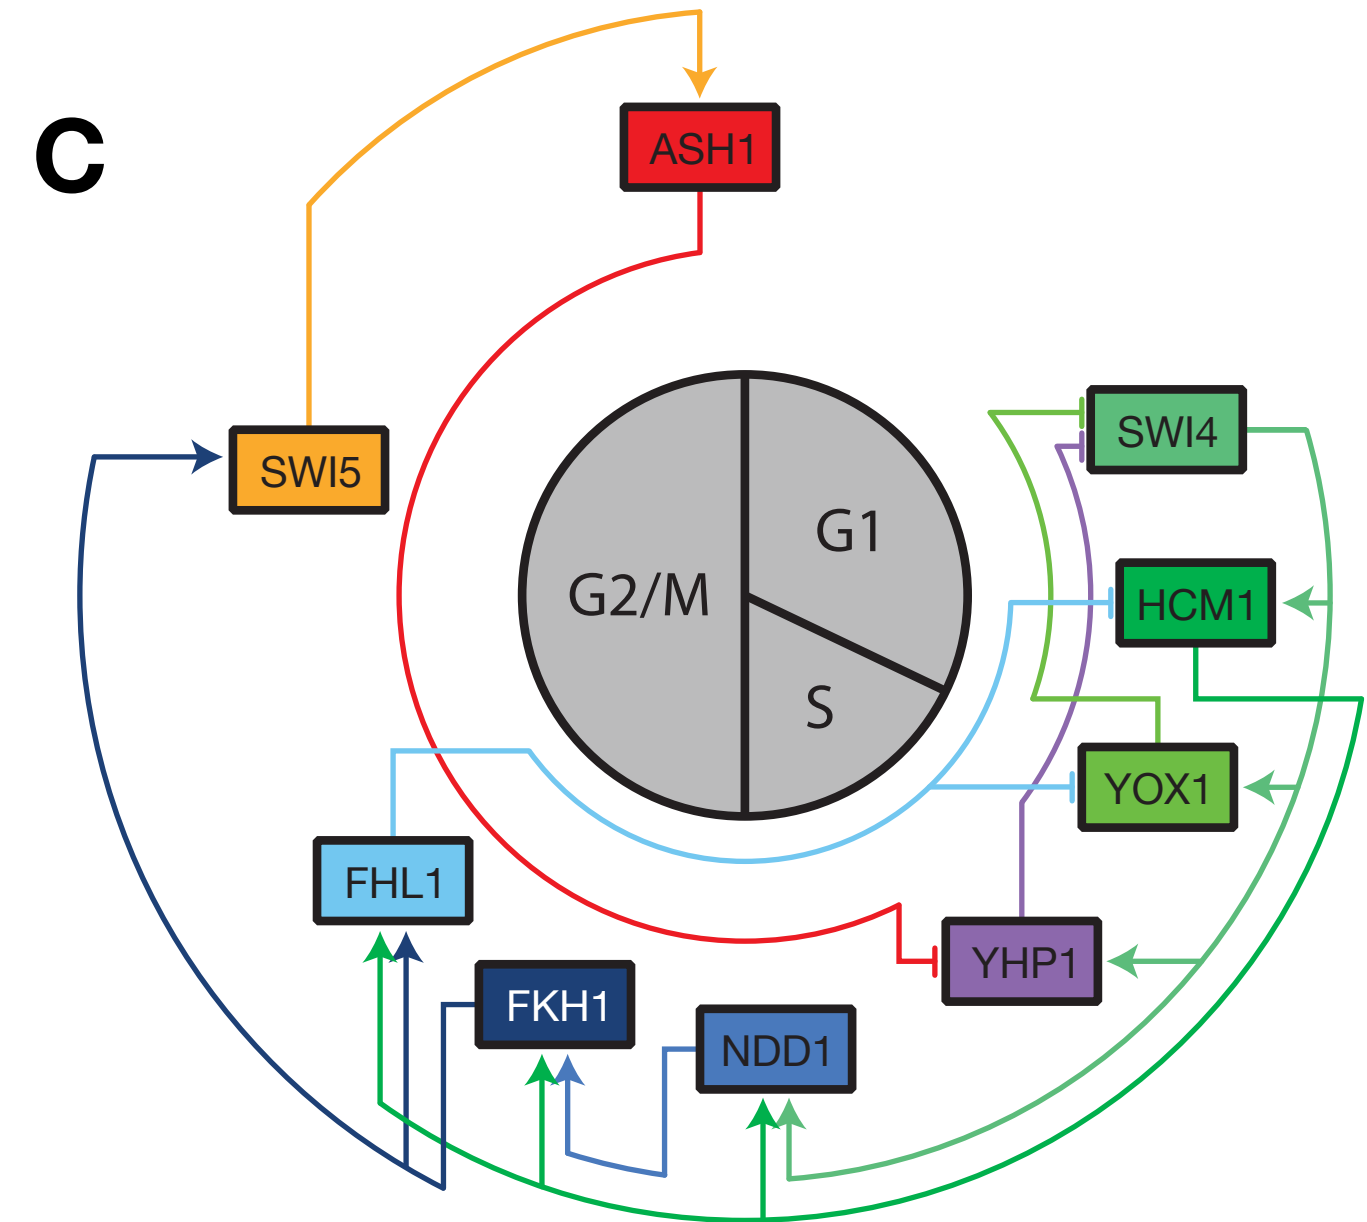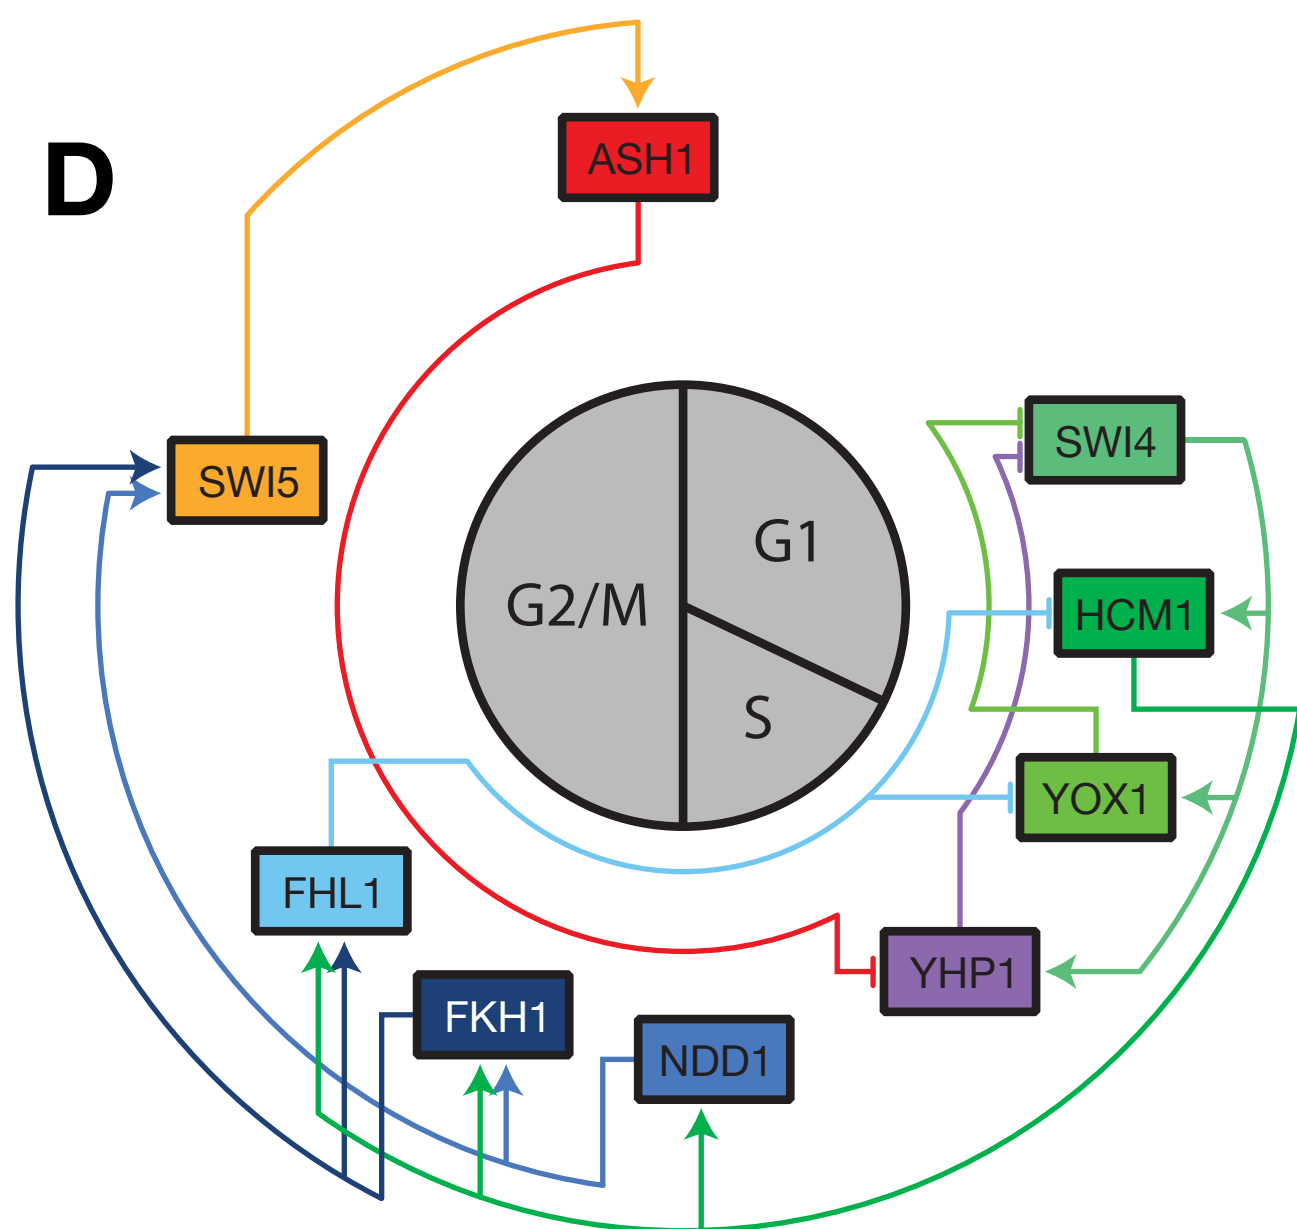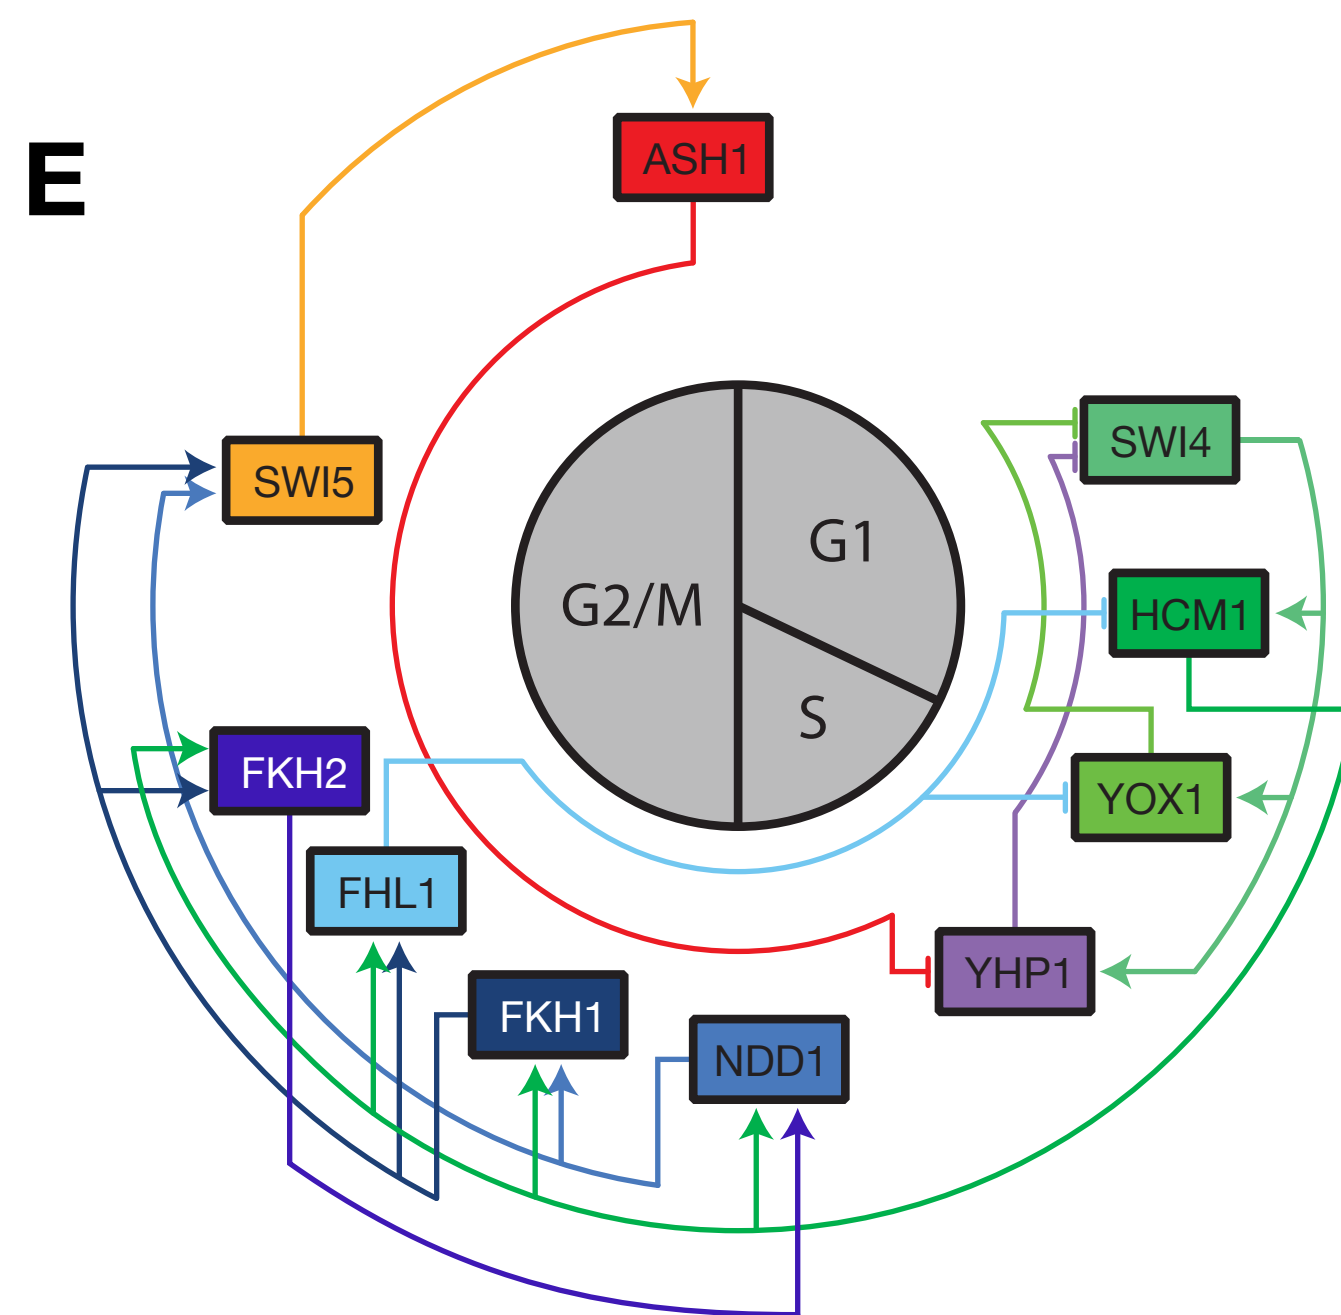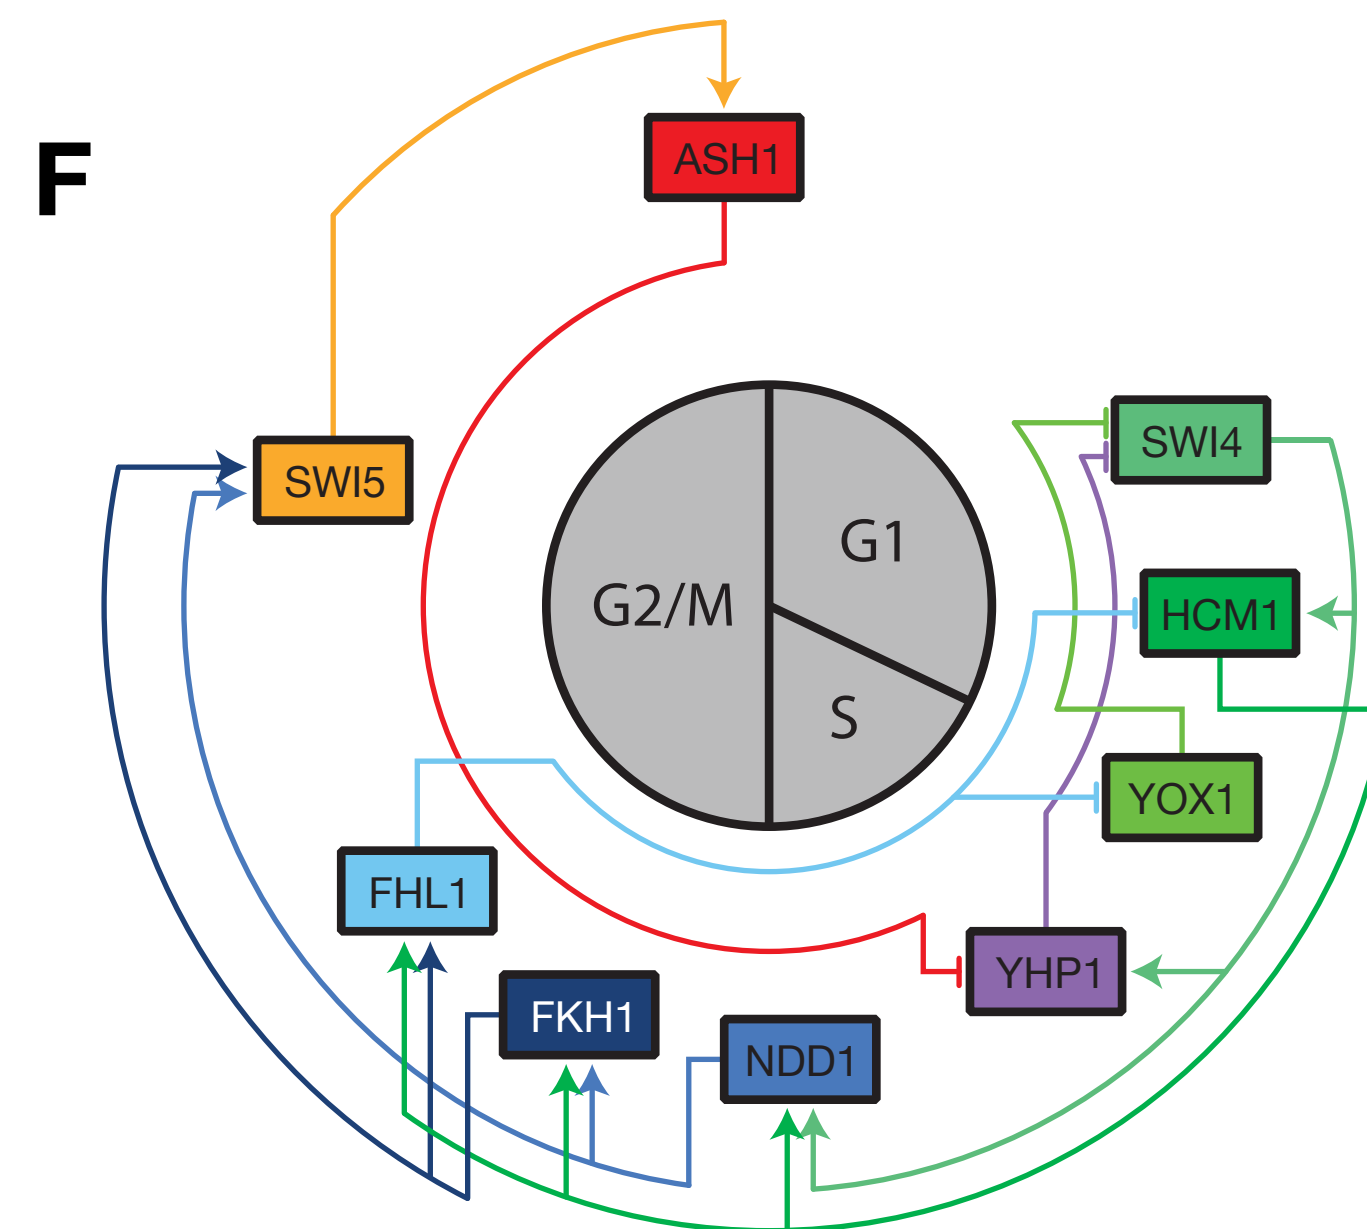

Supplement: supp [file elife-12188-supp-v1.zip]

# Full Regulation of Swi4

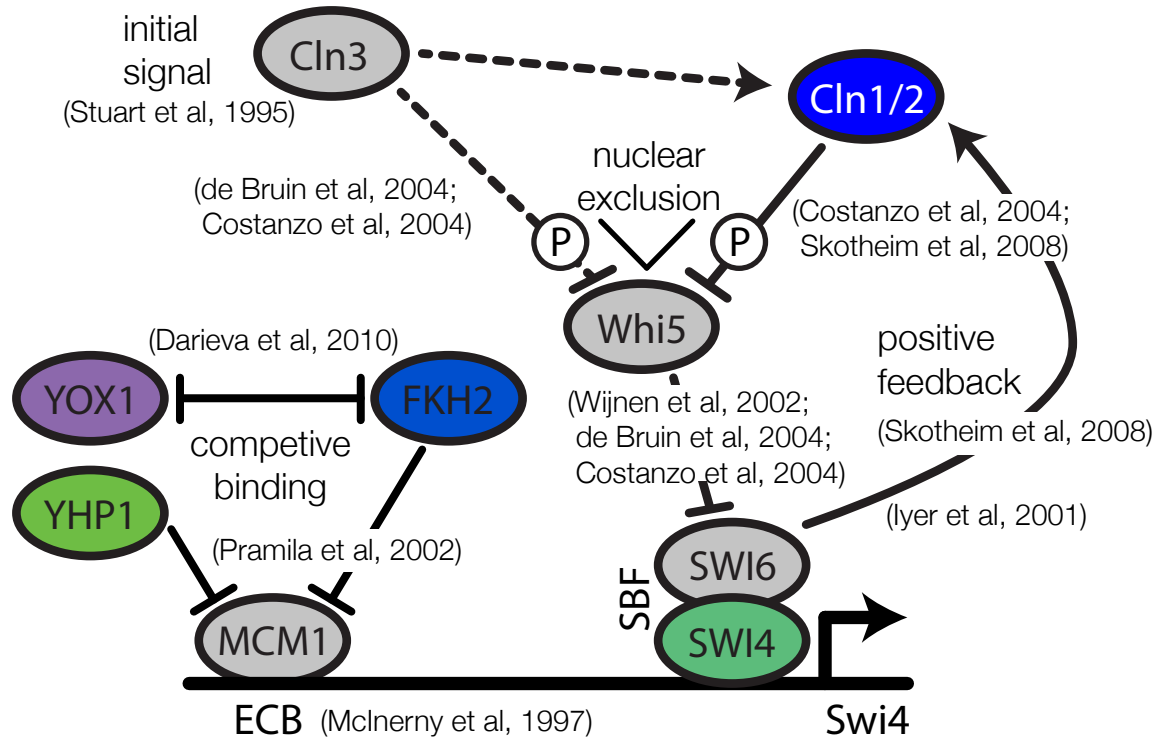

# Effective Regulation of Swi4

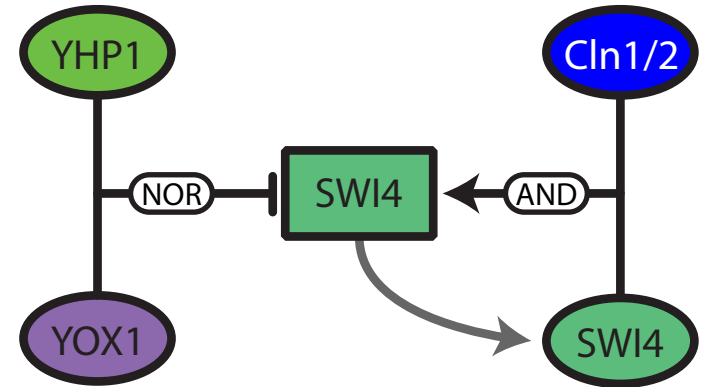

Supplement: supp [file elife-12188-supp-v1.zip]
